# Supplementary material for: GmBICs Modulate Low Blue Light-Induced Stem Elongation in Soybean
Source: Front Plant Sci. 2022 Feb 3;13:803122. doi: 10.3389/fpls.2022.803122 (PMC8850649; doi:10.3389/fpls.2022.803122)
Supplement: Supplementary file 1 [file Table_1.XLSX]

## Sheet: Sheet1
Primer name	Sequence (5'-3')	Function
GmU6-bic1a-Scaffold-F	AATGTGCCACCACATGGATTGAACGAGTCTCAGTATCTCGGTTTTAGAGCTAGAAATAGCAA	Cloning GmBIC1a gRNA+scaffold
GmU6-bic1b-Scaffold-F	AATGTGCCACCACATGGATTGCTTGACTCTCGATATGGAGGTTTTAGAGCTAGAAATAGCAA	Cloning GmBIC1b gRNA+scaffold
GmU6-bic1c-Scaffold-F	AATGTGCCACCACATGGATTGTGTTGCAACGAGGAGAATAGTTTTAGAGCTAGAAATAGCAA	Cloning GmBIC1c gRNA+scaffold
GmU6-bic1d-Scaffold-F	AATGTGCCACCACATGGATTGGTATGGATTCCAGAGATATGTTTTAGAGCTAGAAATAGCAA	Cloning GmBIC1d gRNA+scaffold
GmU6-bic2a-Scaffold-F	AATGTGCCACCACATGGATTGGTCCCACAACATACCTACAGTTTTAGAGCTAGAAATAGCAA	Cloning GmBIC2a gRNA+scaffold
GmU6-bic2a2b-Scaffold-F	AATGTGCCACCACATGGATTGGGTCAGGAGCCAAAGTTGAGTTTTAGAGCTAGAAATAGCAA	Cloning GmBIC2a2b gRNA+scaffold
U6-Xbal-F	GGAAGCTTAGGCCTTCTAGAAAAATAAATGGTAAAATGTC	Cloning GmU6
U6-R	CAATCCATGTGGTGGCACAT	Cloning GmU6
gRNA-Xbal-R	GCTCGGCAACGCGTTCTAGA AAAAAAAGCACCGACTCGGT	Cloning gRNA+scaffold
Dual-U6-F1	GCCTTCTAGAGAGACCAAAATAAATGGTAAAATGTCAA	Constructing CRISPR vector
Dual-U6-R1	TCTCGAATTCGAGACCAAAAAAAGCACCGACTCGGTGC	Constructing CRISPR vector
Dual-U6-F2	GGTCTCGGATCCGAGACCAAAATAAATGGTAAAATGTC	Constructing CRISPR vector
Dual-U6-R2	TTGTAGATCTGAGACCAAAAAAAGCACCGACTCGGTGC	Constructing CRISPR vector
pA7-BIC1a-F	CGAATTCCTGCAGCCCGGGATGAAAGAGAAAACCCTCTC	Constructing subcellular localization vector
pA7-BIC1a-R	CCATACTAGTGGATCCACACCTGTTCTCGATTCTCA	Constructing subcellular localization vector
pA7-BIC1b-F	CGAATTCCTGCAGCCCGGGATGGCTCACCAATATCCCTC	Constructing subcellular localization vector
pA7-BIC1b-R	CCATACTAGTGGATCCACACCTGTTCTCGATTCTCA	Constructing subcellular localization vector
pA7-BIC1c-F	CGAATTCCTGCAGCCCGGGATGGCTCACCAATCCTCTTC	Constructing subcellular localization vector
pA7-BIC1c-R	CCATACTAGTGGATCCATCCGAATTATACGTAACTG	Constructing subcellular localization vector
pA7-BIC1d-F	CGAATTCCTGCAGCCCGGGATGGCTCACCAATCCTCTTC	Constructing subcellular localization vector
pA7-BIC1d-R	CCATACTAGTGGATCCCATTTGTGCAGTTGTTATTA	Constructing subcellular localization vector
pA7-BIC2a-F	CGAATTCCTGCAGCCCGGGATGGAAGAAAGCAAATTGTC	Constructing subcellular localization vector
pA7-BIC2a-R	CCATACTAGTGGATCCATATAGTCTTGGTGACTTTG	Constructing subcellular localization vector
pA7-BIC2b-F	CGAATTCCTGCAGCCCGGGATGGAAGGAAACAATTTGCC	Constructing subcellular localization vector
pA7-BIC2b-R	CCATACTAGTGGATCCATATAACCTTGGTGACTTTG	Constructing subcellular localization vector
RT-BIC-1aF	TGGATCACAATGCTACAA	qRT-PCR
RT-BIC-1aR	CACTCTATGCCTCTTCAA	qRT-PCR
RT-BIC-1bF	ATATCATTCCTCCTCAAC	qRT-PCR
RT-BIC-1bR	GACAATCTAAGACTAATTCC	qRT-PCR
RT-BIC-1cF	CTTCTCATCATCAGCCATTG	qRT-PCR
RT-BIC-1cR	TCTCTTCTTGTTGTAGTTCCA	qRT-PCR
RT-BIC-1dF	TATTCCTTCTCATCATCAC	qRT-PCR
RT-BIC-1dR	TCTCTATTATTATCTCCATCATA	qRT-PCR
RT-BIC-2aF	GCTCAAGAATAACAGTCAAG	qRT-PCR
RT-BIC-2aR	CTCTACATCATCATCAACCT	qRT-PCR
RT-BIC-2bF	GAAGGACTGGATGGACTAT	qRT-PCR
RT-BIC-2bR	ACGAGCATTAGCAATAAGAG	qRT-PCR
ACTIN11-QF	ATCTTGACTGAGCGTGGTTATTCC	qRT-PCR
ACTIN11-QR	GCTGGTCCTGGCTGTCTCC	qRT-PCR
OE-BIC1a-F	CAAAAAAGCAGGCTTCATGAAAGAGAAAACCCTCTC	Constructing overexpression vector
OE-BIC1a-R	CAAGAAAGCTGGGTCACACCTGTTCTCGATTCTCA	Constructing overexpression vector
OE-BIC1b-F	CAAAAAAGCAGGCTTCATGGCTCACCAATATCCCTC	Constructing overexpression vector
OE-BIC1b-R	CAAGAAAGCTGGGTCACACCTGTTCTCGATTCTCA	Constructing overexpression vector
OE-BIC1c-F	CAAAAAAGCAGGCTTCATGGCTCACCAATCCTCTTC	Constructing overexpression vector
OE-BIC1c-R	CAAGAAAGCTGGGTCATCCGAATTATACGTAACTG	Constructing overexpression vector
OE-BIC1d-F	CAAAAAAGCAGGCTTCATGGCTCACCAATCCTCTTC	Constructing overexpression vector
OE-BIC1d-R	CAAGAAAGCTGGGTCCATTTGTGCAGTTGTTATTA	Constructing overexpression vector
OE-BIC2a-F	CAAAAAAGCAGGCTTCATGGAAGAAAGCAAATTGTC	Constructing overexpression vector
OE-BIC2a-R	CAAGAAAGCTGGGTCATATAGTCTTGGTGACTTTG	Constructing overexpression vector
OE-BIC2b-F	CAAAAAAGCAGGCTTCATGGAAGGAAACAATTTGCC	Constructing overexpression vector
OE-BIC2b-R	CAAGAAAGCTGGGTCATATAACCTTGGTGACTTTG	Constructing overexpression vector
attb-F	GTGGGGACAAGTTTGTACAAAAAAGCAGGCTTC	Constructing overexpression vector
attb-R	GTGGGGACCACTTTGTACAAGAAAGCTGGGTC	Constructing overexpression vector
